# Supplementary material for: Screening of viral-vectored P. falciparum pre-erythrocytic candidate vaccine antigens using chimeric rodent parasites
Source: PubMed Central journal article supplement (PMC8274855; doi:10.1371/journal.pone.0254498), 2021-07-12

| A  |               |         | S.No Chimeric parasite Line # |                         |         | S.No Chimeric parasite name Line # |  |  |
|----|---------------|---------|-------------------------------|-------------------------|---------|------------------------------------|--|--|
| 1  | HT@PbUIS4     | 2409cl4 | 12                            | P36@PbUIS4              | 3029cl1 |                                    |  |  |
| 2  | RP-L3@PbUIS4  | 2411cl1 | 13                            | P52@PbUIS4              | 3032cl1 |                                    |  |  |
| 3  | SPELD@PbUIS4  | 2887cl1 | 14                            | SPECT2@PbUIS4           | 3039cl1 |                                    |  |  |
| 4  | GEST@PbUIS4   | 2888cl4 | 15                            | B9@PbUIS4               | 2392cl2 |                                    |  |  |
| 5  | GEST@PbUIS4   | 3015cl1 | 16                            | MAEBL@PbUIS4            | 3047cl4 |                                    |  |  |
| 6  | ETRAMP@PbUIS4 | 2891cl1 | 17                            | MAEBL@PbUIS4            | 3108cl1 |                                    |  |  |
| 7  | SSP3@PbUIS4   | 2895cl1 | 18                            | <i>Pb</i> SPECT2-GIMO   | 3144cl3 |                                    |  |  |
| 8  | SSP3@PbUIS4   | 3018cl1 | 19                            | <i>Pb-Pf</i> SPECT2 (r) | 3162cl2 |                                    |  |  |
| 9  | SIAP1@PbUIS4  | 2909cl4 | 20                            | <i>Pb-Pf</i> B9 (r)     | 2355cl1 |                                    |  |  |
| 10 | SIAP2@PbUIS4  | 2911cl1 | 21                            | <i>Pb</i> S1-GIMO       | 2149cl2 |                                    |  |  |
| 11 | SPATR@PbUIS4  | 3026cl1 |                               |                         |         |                                    |  |  |

B

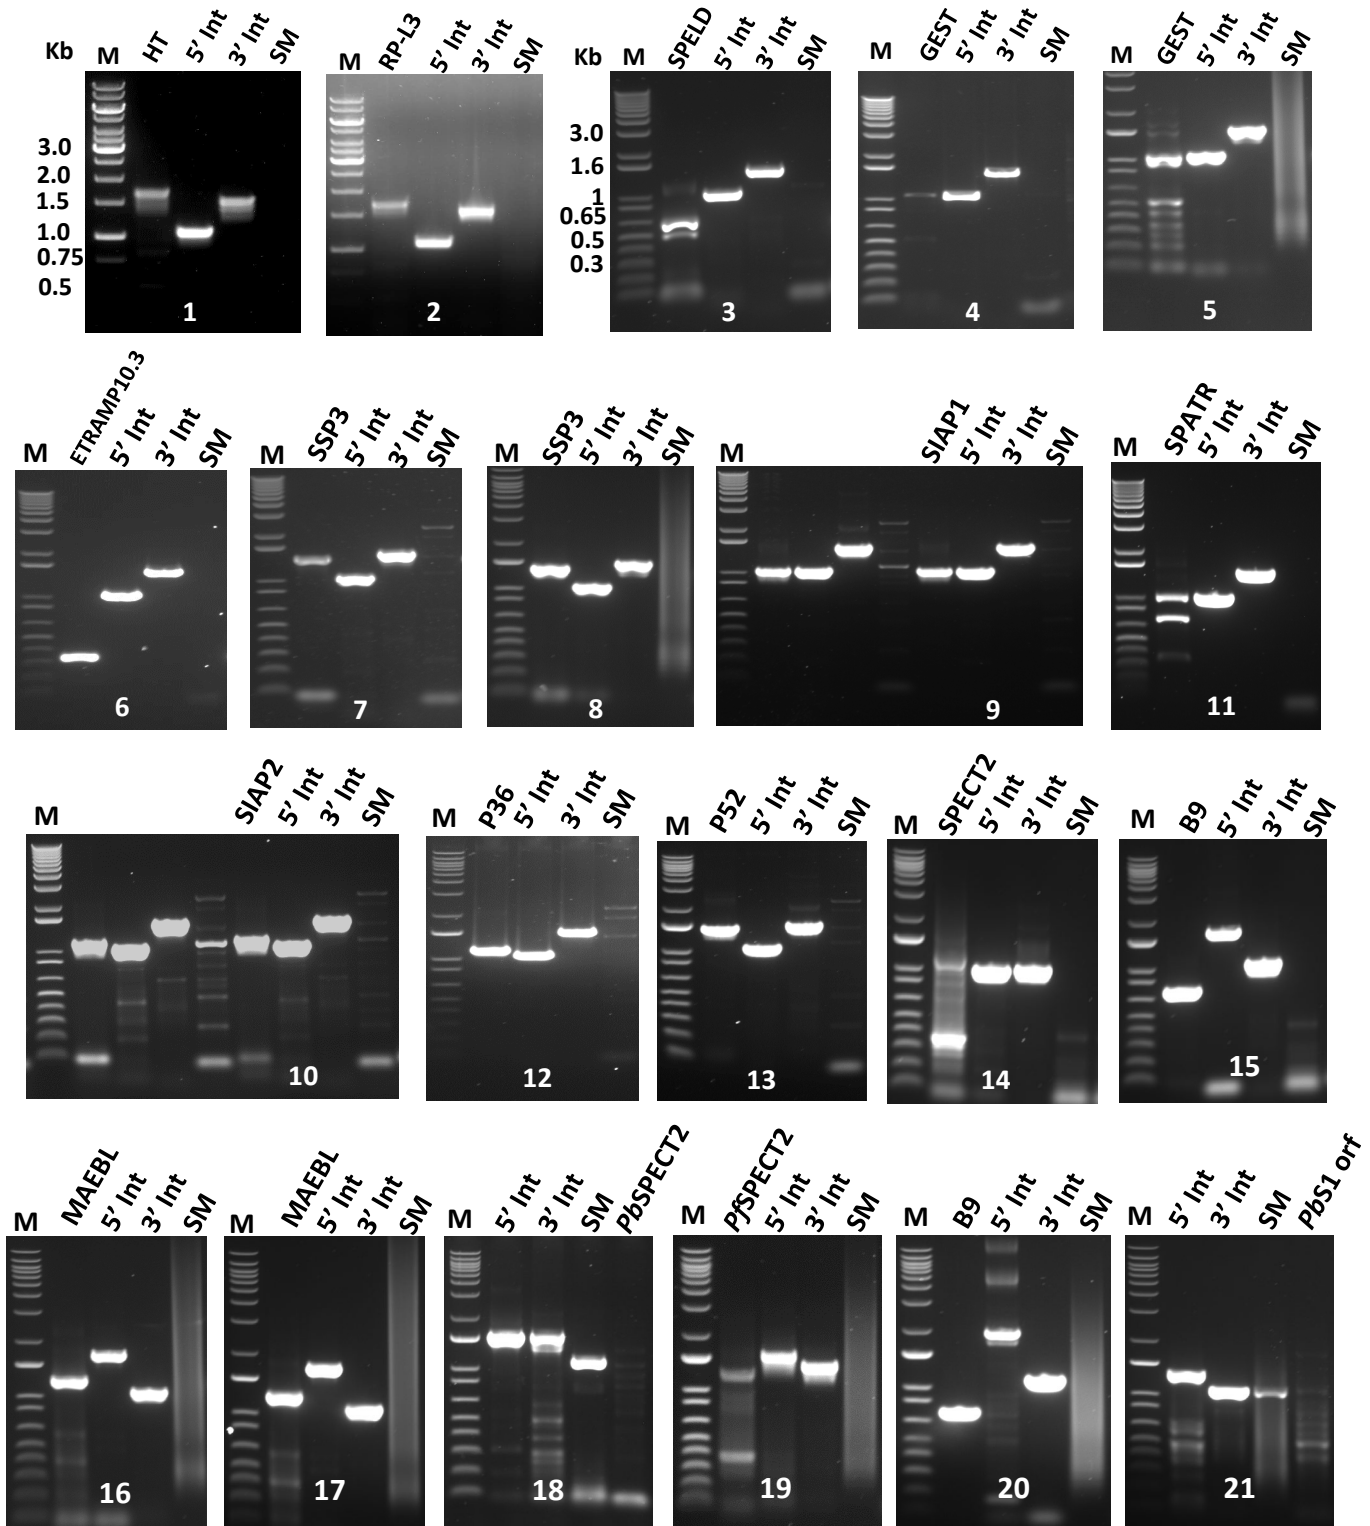

C

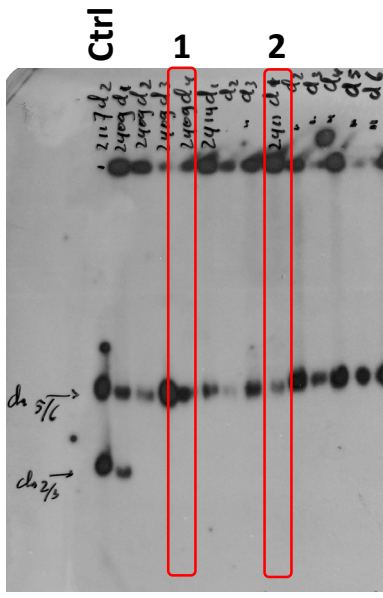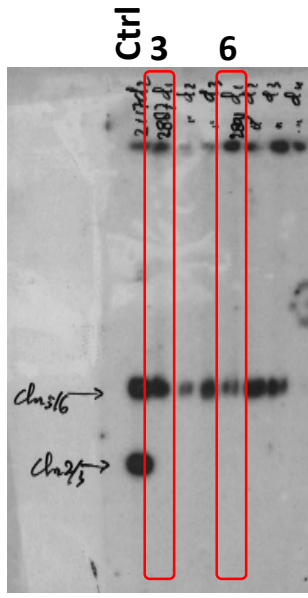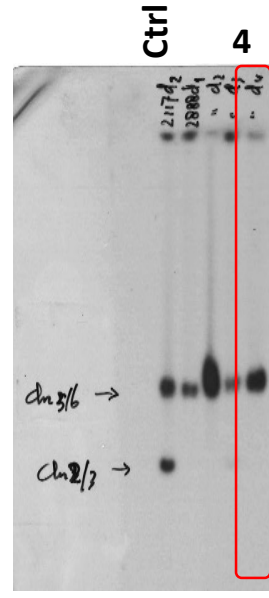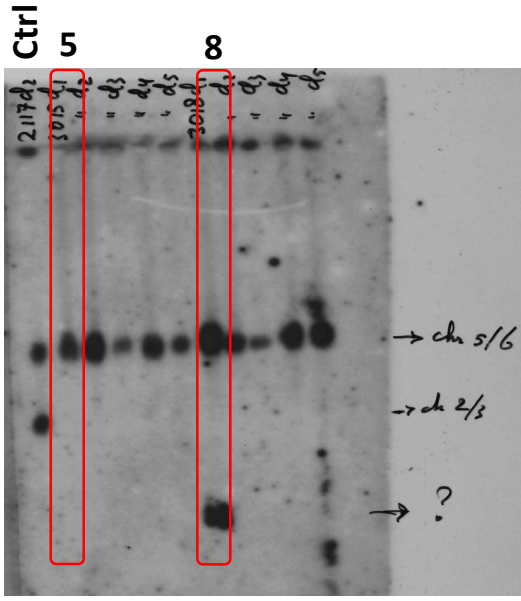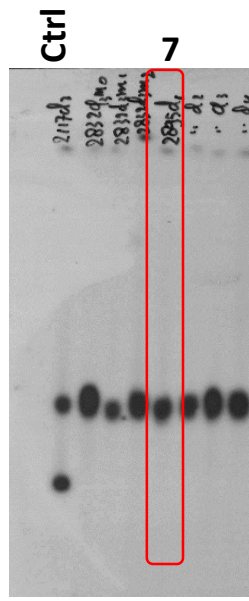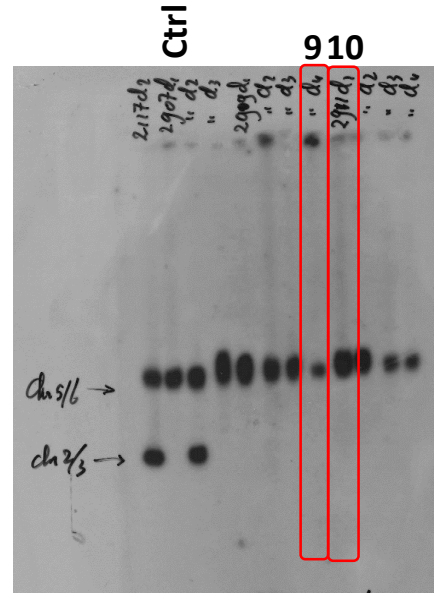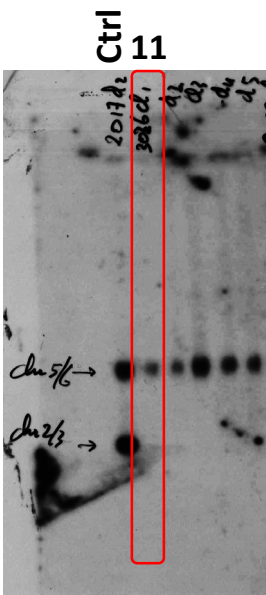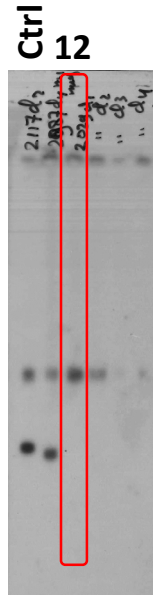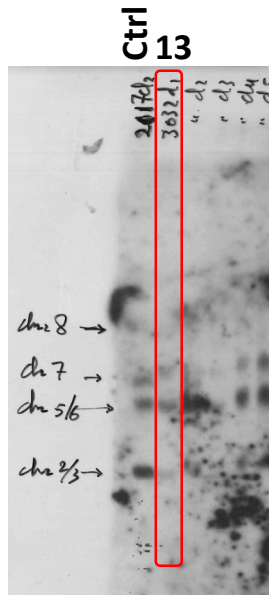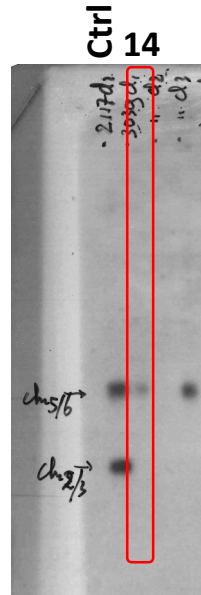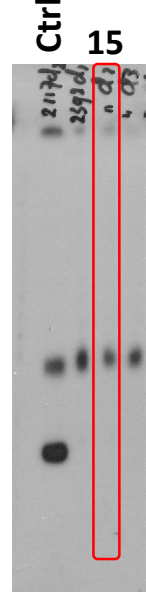

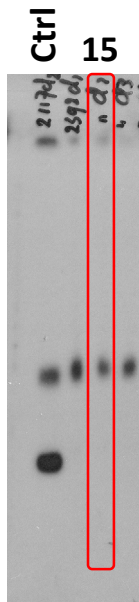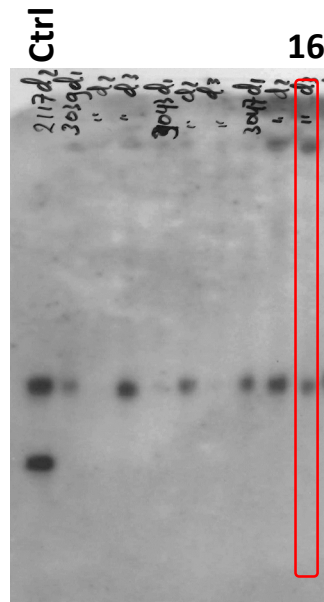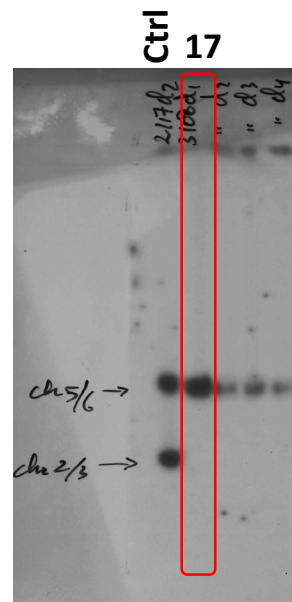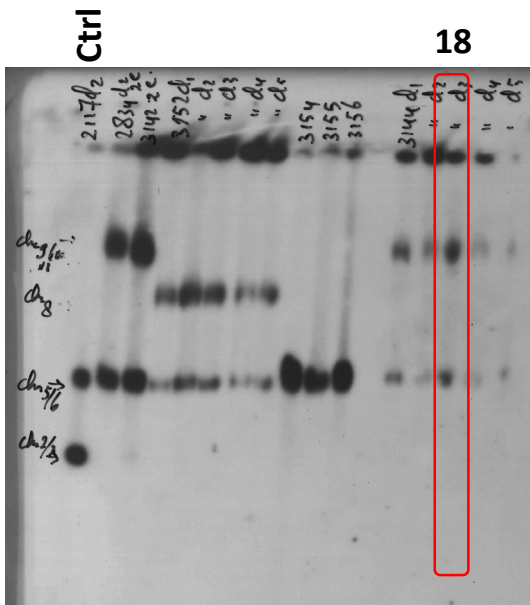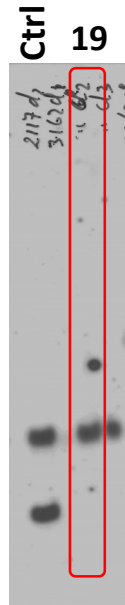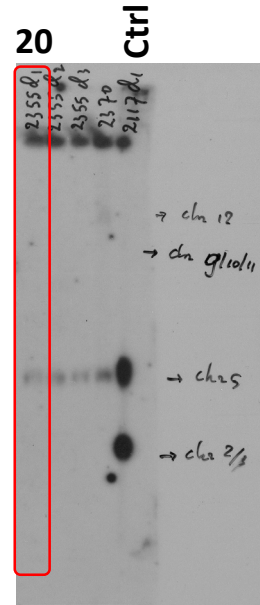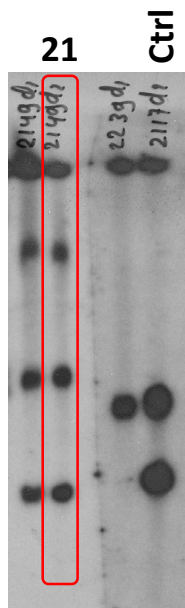

Supplement: pone.0254498.s005.pdf [file pone.0254498.s005.pdf]
