# Supplementary material for: Screening of viral-vectored P. falciparum pre-erythrocytic candidate vaccine antigens using chimeric rodent parasites
Source: PubMed Central journal article supplement (PMC8274855; doi:10.1371/journal.pone.0254498), 2021-07-12

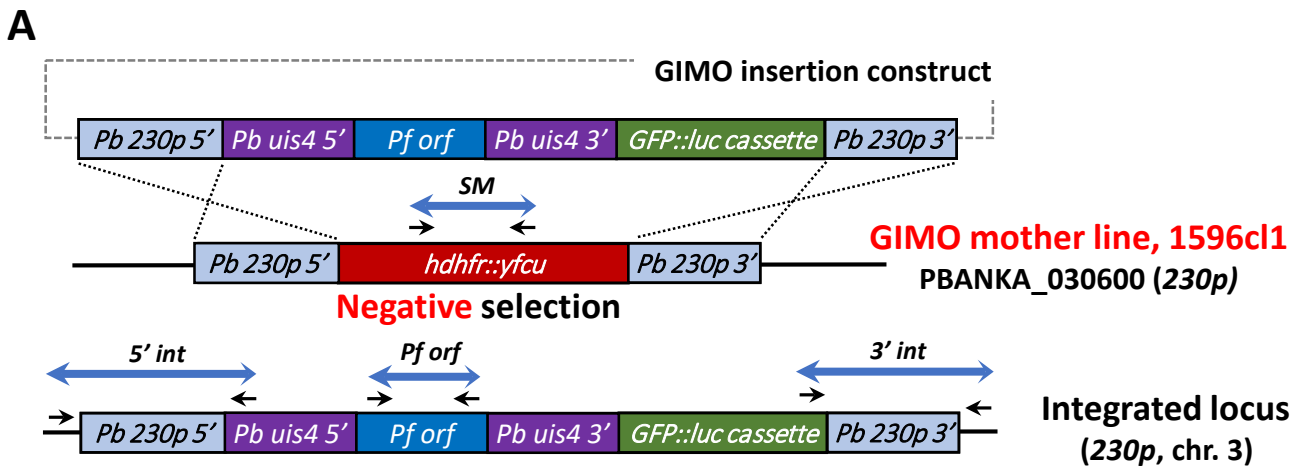

| S.No | Chimeric parasite | Line #  | S.No | Chimeric parasite name | Line #  |
|------|-------------------|---------|------|------------------------|---------|
| 1    | HT@PbUIS4         | 2409cl4 | 8    | SSP3@PbUIS4            | 3018cl1 |
| 2    | RP-L3@PbUIS4      | 2411cl1 | 9    | SIAP1@PbUIS4           | 2909cl4 |
| 3    | SPELD@PbUIS4      | 2887cl1 | 10   | SIAP2@PbUIS4           | 2911cl1 |
| 4    | GEST@PbUIS4       | 2888cl4 | 11   | SPATR@PbUIS4           | 3026cl1 |
| 5    | GEST@PbUIS4       | 3015cl1 | 12   | P36@PbUIS4             | 3029cl1 |
| 6    | ETRAMP@PbUIS4     | 2891cl1 | 13   | P52@PbUIS4             | 3032cl1 |
| 7    | SSP3@PbUIS4       | 2895cl1 | 14   | SPECT2@PbUIS4          | 3039cl1 |

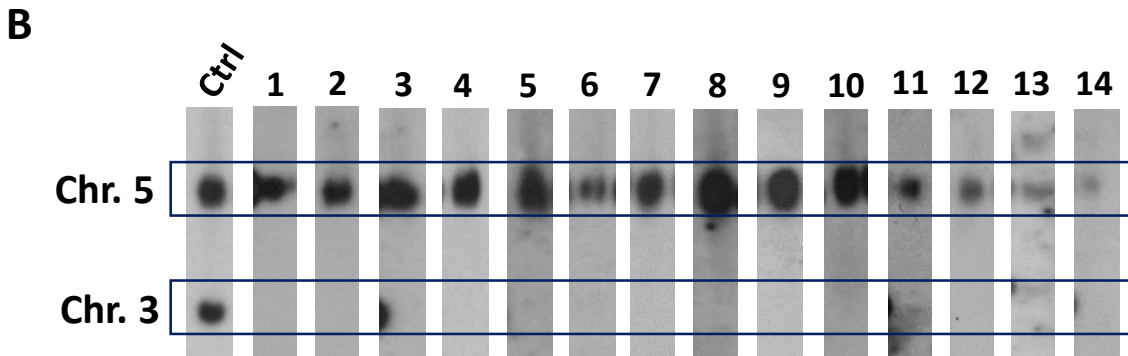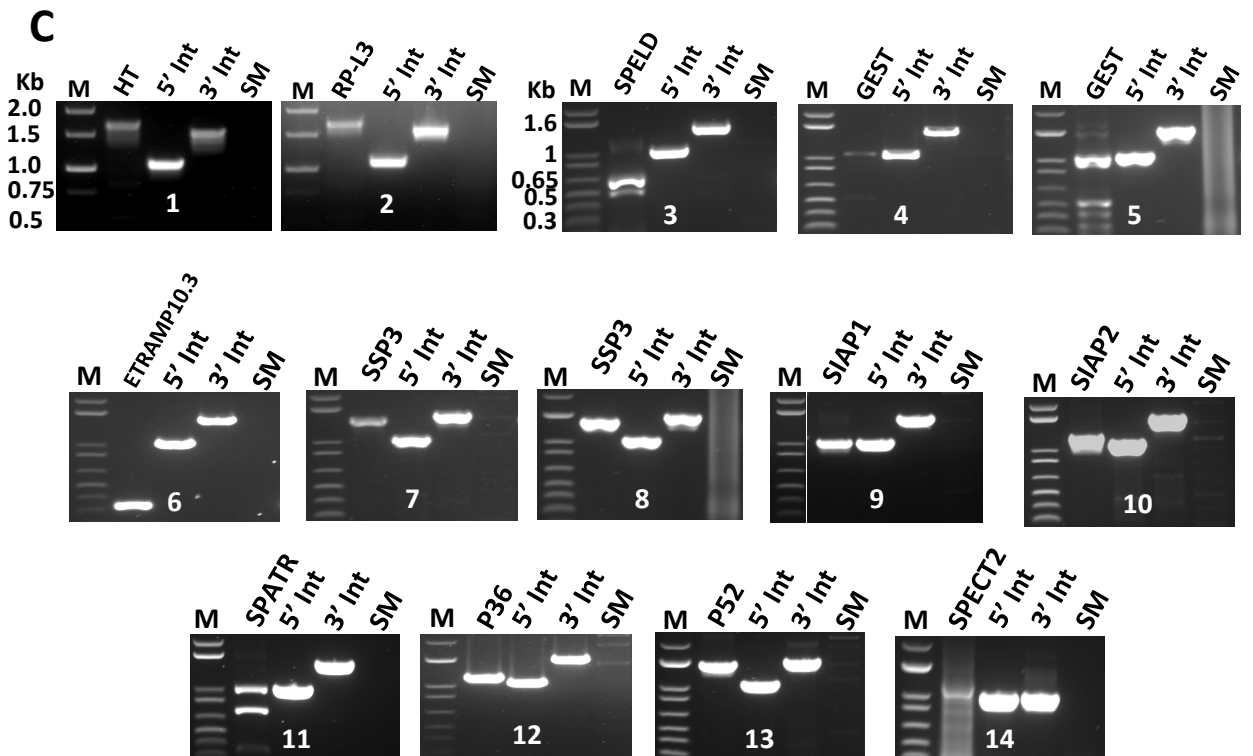

Supplement: pone.0254498.s001.pdf [file pone.0254498.s001.pdf]
