# Supplementary material for: Screening of viral-vectored P. falciparum pre-erythrocytic candidate vaccine antigens using chimeric rodent parasites
Source: PubMed Central journal article supplement (PMC8274855; doi:10.1371/journal.pone.0254498), 2021-07-12

**A**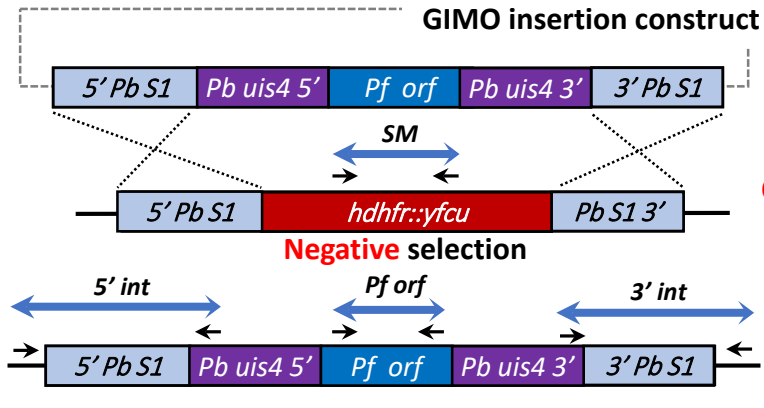**Insertions constructs***b9* : pL2041*maebl* : pL2289**GIMO mother line, 2149c12**PBANKA\_120680 (*s1* locus)**Integrated locus**(*s1*; chr. 12)

| S.No | Parasite line | Line #  |
|------|---------------|---------|
| 15   | B9@PbUIS4     | 2392c12 |
| 16   | MAEBL@PbUIS4  | 3047c14 |
| 17   | MAEBL@PbUIS4  | 3108c11 |

**B**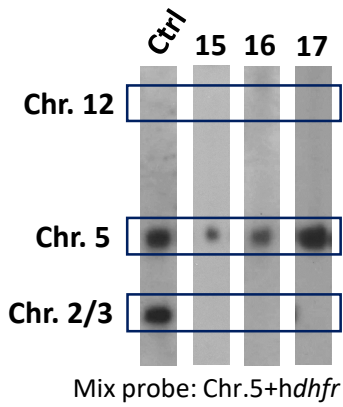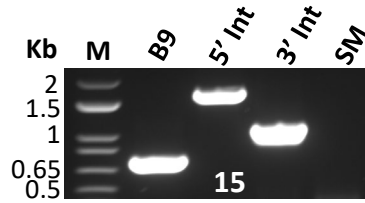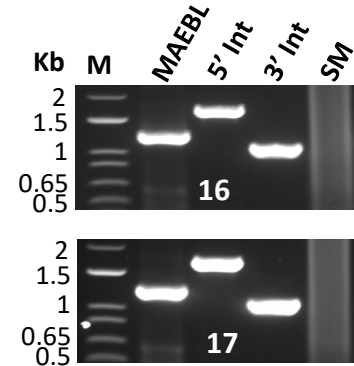

Supplement: pone.0254498.s002.pdf [file pone.0254498.s002.pdf]
