# Supplementary material for: Screening of viral-vectored P. falciparum pre-erythrocytic candidate vaccine antigens using chimeric rodent parasites
Source: PubMed Central journal article supplement (PMC8274855; doi:10.1371/journal.pone.0254498), 2021-07-12

**A**

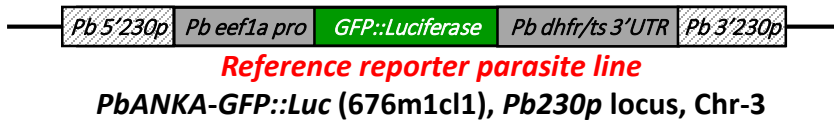

**B**

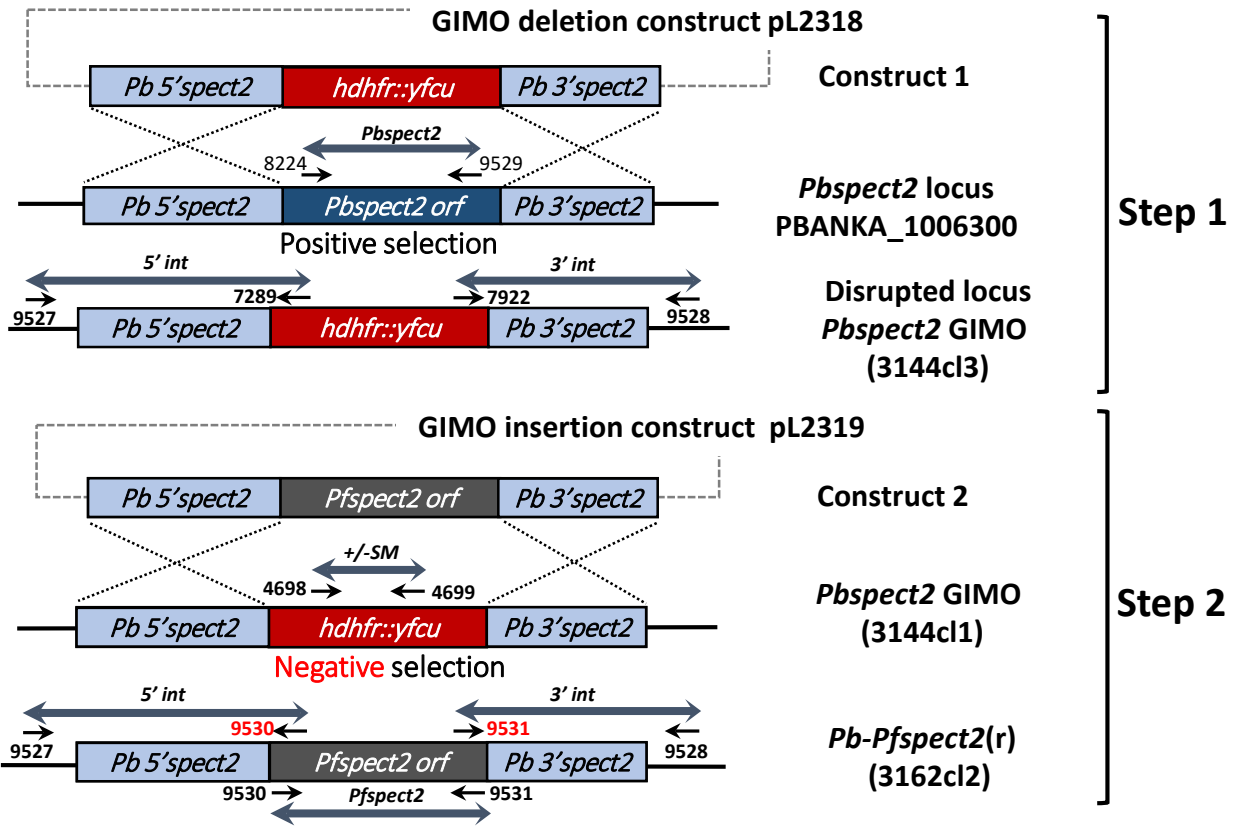

| S.No | Parasite line                    | Line #  |
|------|----------------------------------|---------|
| 18   | <i>Pbspect2</i> -GIMO            | 3144cl3 |
| 19   | <i>Pb</i> - <i>Pf</i> SPECT2 (r) | 3162cl2 |

**C**

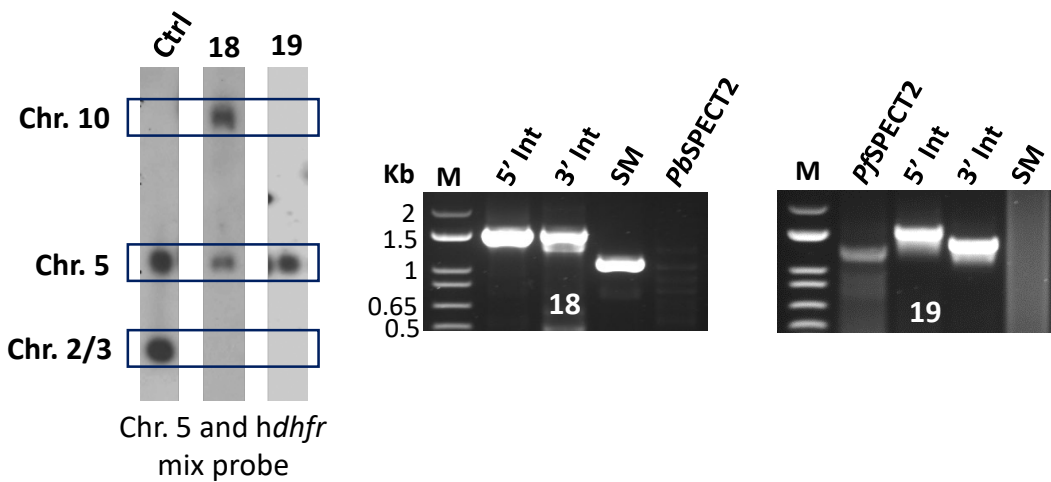

D

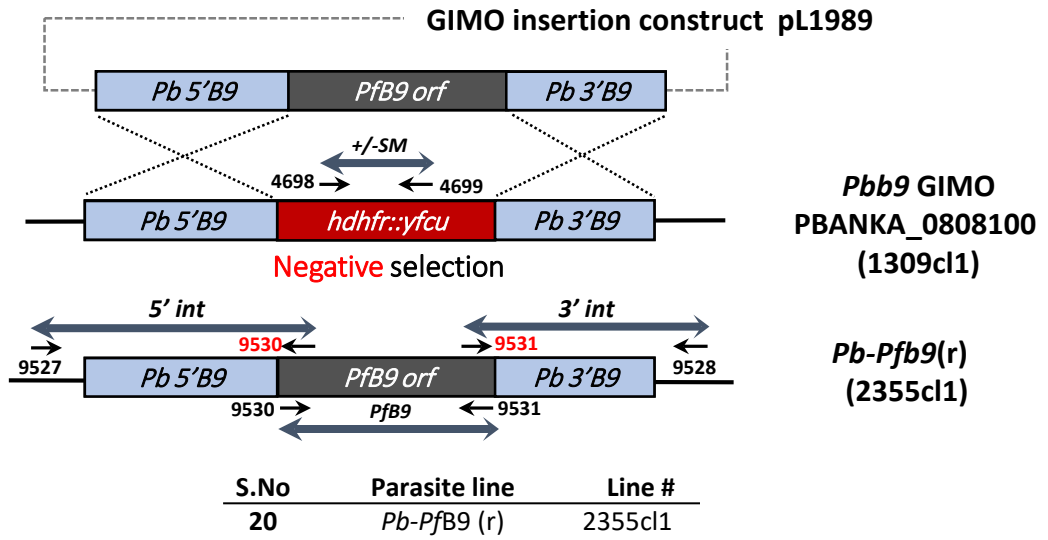

E

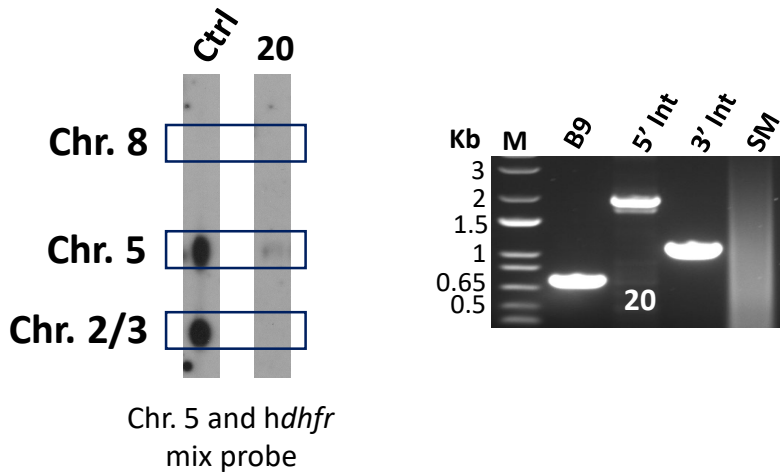

Supplement: pone.0254498.s003.pdf [file pone.0254498.s003.pdf]
