# Supplementary material for: Screening of viral-vectored P. falciparum pre-erythrocytic candidate vaccine antigens using chimeric rodent parasites
Source: PubMed Central journal article supplement (PMC8274855; doi:10.1371/journal.pone.0254498), 2021-07-12

**A**

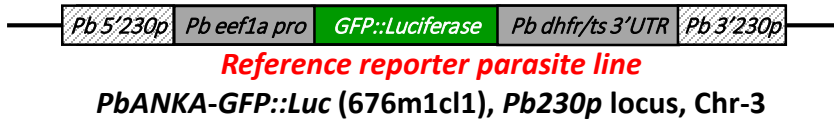

**B**

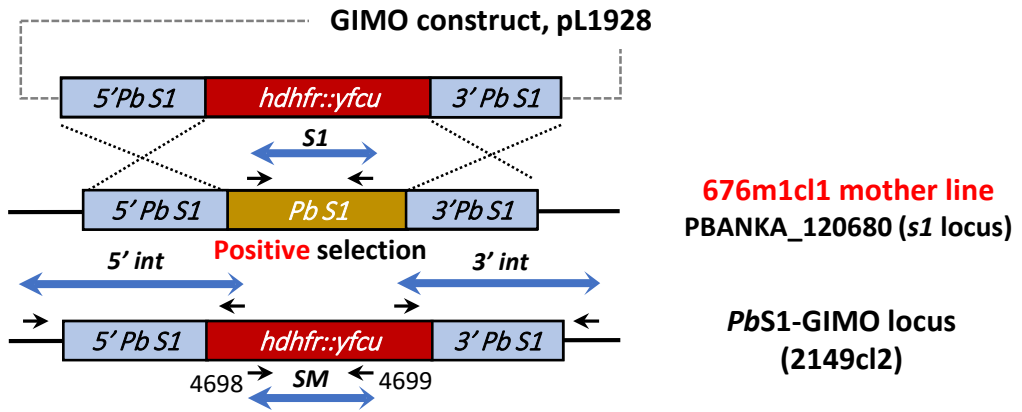

**C**

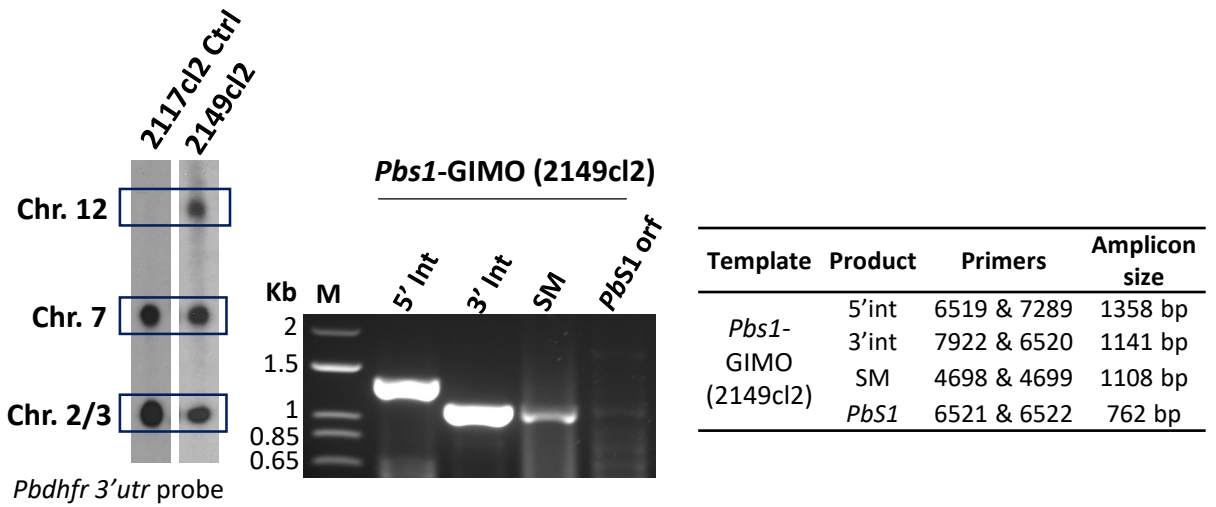

Supplement: pone.0254498.s004.pdf [file pone.0254498.s004.pdf]
